# Supplementary material
Source: Elsevier journal article supplement (https://univ-rennes.hal.science/hal-01304354v1/file/mmc1.docx)
Supplement: mmc1 [file mmc1.docx]

**Semi-volatile organic compounds in the particulate phase in dwellings: A nationwide survey in France**

Corinne Mandin, Fabien Mercier, Olivier Ramalho, Jean-Paul Lucas, Erwann Gilles, Olivier Blanchard, Nathalie Bonvallot, Philippe Glorennec and Barbara Le Bot

**Supporting Information – 3 pages**

**Table S1.** Chemical names, abbreviations, CAS numbers, molecular weights (MW) and boiling points (Bp) of the 66 target SVOCs

| **Compound** | **Abbreviation** | **CAS no** | **MW (g mol-1)** | | **Bp ( °C)** |
| --- | --- | --- | --- | --- | --- |
| **Polycyclic aromatic hydrocarbons (PAHs)** | | | |
| Anthracene | ANT | 120-12-7 | 178.2 | | 342 a |
| Benzo(a)anthracene | BaA | 56-55-3 | 228.3 | | 438 a |
| Benzo(a)pyrene | BaP | 50-32-8 | 252.3 | | 495 b |
| Benzo(b)fluoranthene | BbF | 205-99-2 | 252.3 | | 481 b |
| Benzo(g,h,i)perylene | BgP | 191-24-2 | 276.3 | | 550 a |
| Benzo(k)fluoranthene | BkF | 207-08-9 | 252.3 | | 480 a |
| Chrysene | CHR | 218-01-9 | 228.3 | | 448 a |
| Dibenzo(a,h)anthracene | DBA | 53-70-3 | 278.4 | | 524 a |
| Fluoranthene | FAN | 206-44-0 | 202.3 | | 384 a |
| Fluorene | FLU | 86-73-7 | 166.2 | | 295 a |
| Indeno(1,2,3-c,d)pyrene | IND | 193-39-5 | 276.3 | | 536 a |
| Phenanthrene | PHE | 85-01-8 | 178.2 | | 340 a |
| Pyrene | PYR | 129-00-0 | 202.3 | | 404 a |
| **Organochlorine pesticides** | | | |
| Aldrin | - | 309-00-2 | 364.9 | | 145 b (1) |
| α-endosulfan | - | 959-98-8 | 406.9 | | 106 b (2) |
| α-hexachlorocyclohexane | α-HCH | 319-84-6 | 290.8 | | 288 b |
| Atrazine | - | 1912-24-9 | 215.7 | | 205 c |
| Cis-chlordane | - | 5103-71-9 | 409.8 | | 175 b (1) |
| Dieldrin | - | 60-57-1 | 380.9 | | > 265 b |
| Endrin | - | 72-20-8 | 380.9 | | 245 b |
| Heptachlor | - | 76-44-8 | 373.3 | | 135 b (3) |
| γ-hexachlorocyclohexane / lindane | γ-HCH | 58-89-9 | 290.8 | | 323 a |
| Metolachor | - | 51218-45-2 | 283.8 | | 100 b (4) |
| Oxadiazon | - | 19666-30-9 | 345.2 | | - |
| Trans-chlordane | - | 5103-74-2 | 409.8 | | 175 b (1) |
| 4,4’-dichlorodiphenyldichloroethylene | 4,4’-DDE | 72-55-9 | 318.0 | | - |
| 4,4’-dichlorodiphenyltrichloroethane | 4,4’-DDT | 50-29-3 | 354.5 | | 260 a |
| **Organophosphorous pesticides** | | | |
| Chlorpyrifos | - | 2921-88-2 | 350.6 | | - |
| Diazinon | - | 333-41-5 | 304.3 | | 125 b (3) |
| **Pyrethroids** | | | |
| Permethrin | - | 52645-53-1 | 391.3 | | < 290 a |
| **Polybromodiphenyl ethers (PBDEs)** | | | |
| 2,4,4'-tribromodiphenyl ether | BDE 28 | 41318-75-6 | 406.9 | | - |
| 2,2',4,4'-tetrabromodiphenyl ether | BDE 47 | 5436-43-1 | 485.8 | | - |
| 2,2',3,4,4'-pentabromodiphenyl ether | BDE 85 | 182346-21-0 | 564.7 | | - |
| 2,2',4,4',5-pentabromodiphenyl ether | BDE 99 | 60348-60-9 | 564.7 | | - |
| 2,2',4,4',6-pentabromodiphenyl ether | BDE 100 | 189084-64-8 | 564.7 | | - |
| 2,3',4,4',6-pentabromodiphenyl ether | BDE 119 | 189084-66-0 | 564.7 | | - |
| 2,2',4,4',5,5'-hexabromodiphenyl ether | BDE 153 | 68631-49-2 | 543.7 | | - |
| 2,2',4,4',5,6'-hexabromodiphenyl ether | BDE 154 | 207122-15-4 | 543.6 | | - |
| **Polychlorinated biphenyls (PCBs)** | | | |
| 2.4.4'-trichlorobiphenyl | PCB 28 | 7012-37-5 | 257.5 | | 206-207 b |
| 2,4',5-trichlorobiphenyl | PCB 31 | 16606-02-3 | 257.5 | | - |
| 2,2',5,5'-tetrachlorobiphenyl | PCB 52 | 35693-99-3 | 292.0 | | - |
| 3,3',4,4'-tetrachlorobiphenyl | PCB 77 | 32598-13-3 | 292.0 | | - |
| 2,2',4,5,5'-pentachlorobiphenyl | PCB 101 | 37680-73-2 | 326.4 | | - |
| 2,3,3',4,4'-pentachlorobiphenyl | PCB 105 | 32598-14-4 | 326.4 | | - |
| 2,3',4,4',5-pentachlorobiphenyl | PCB 118 | 31508-00-6 | 326.4 | | - |
| 3,3',4,4',5-pentachlorobiphenyl | PCB 126 | 57465-28-8 | 326.4 | | - |
| 2,2',3,4,4',5'-hexachlorobiphenyl | PCB 138 | 35065-28-2 | 360.9 | | - |
| 2,2',4,4',5,5'-hexachlorobiphenyl | PCB 153 | 35065-27-1 | 360.9 | | - |
| 2,2',3,4,4',5,5'-heptachlorobiphenyl | PCB 180 | 35065-29-3 | 395.3 | | 240–280 b (5) |
| **Phthalates** | | | |
| Butylbenzyl phthalate | BBP | 85-68-7 | 312.4 | | 370 a |
| Di-2-ethylhexyl phthalate | DEHP | 117-81-7 | 278.4 | | 384 a |
| Di-n-butyl phthalate | DBP | 84-74-2 | 390.6 | | 340 a |
| Diethyl phthalate | DEP | 84-66-2 | 222.2 | | 295 a |
| Di-isobutyl phthalate | DiBP | 84-69-5 | 278.4 | | 297 a |
| Di-isononyl phthalate | DiNP | 68515-48-0 | 418.6 | | 413 b |
| Dimethylethyl phthalate | DMEP | 117-82-8 | 282.3 | | 340 a |
| Dimethyl phthalate | DMP | 131-11-3 | 194.2 | | 284 a |
| Di-n-octyl phthalate | DOP | 117-84-0 | 390.6 | | 220 b |
| **Synthetic musks** | | | |
| Galaxolide | HHCB | [1222-05-5](http://www.commonchemistry.org/ChemicalDetail.aspx?ref=1222-05-5) | 258.4 | | 318 d |
| Tonalide | AHTN | 1506-02-1 | 258.4 | | 326 c |
| **Alkylphenols** | | | |
| 4-n-nonylphenol | - | 104-40-5 | 220.3 | | 295 b |
| 4-tert-butylphenol | - | 98-54-4 | 150.2 | | 237 b |
| 4-tert-octylphenol | - | 140-66-9 | 206.3 | | 279 b |
| **Other compounds** | | | |
| Bisphenol-A | BPA | 80-05-7 | 228.3 | | 361 a |
| Triclosan | - | 3380-34-5 | 289.5 | | - |
| Tri-n-butylphosphate | TBP | 126-73-8 | 266.3 | | 289 b |

Boiling points are given at atmospheric pressure, except when specified.

a: Hazardous Substances Data Bank (HSDB), <http://toxnet.nlm.nih.gov/newtoxnet/hsdb.htm>; b: (Mackay et al., 2006); c: Institute for Occupational Safety and Health of the German Social Accident Insurance (IFA) - GESTIS Substance Database, <http://gestis-en.itrust.de/>; d: European Chemicals Agency, <http://echa.europa.eu/information-on-chemicals/registered-substances>

(1) at 2 mmHg; (2) at 0.7 mmHg; (3) at 1 mmHg; (4) at 0.001 mmHg; (5) at 20 mmHg

**Reference**

Mackay D, Shiu WY, Ma KC, Lee SC. 2006. *Handbook of Physical-Chemical Properties and Environmental Fate for Organic Chemicals*. Second edition. CRC Press, Boca Raton.
